# Supplementary material
Source: Royal Society of Chemistry journal article supplement (doi:10.1039/d6nj01406b)
Supplement: d6nj01406b1.pdf [file d6nj01406b1.pdf]

## Supporting information

# Tuning Pt Surface Adsorption Energy with a Cr<sub>2</sub>O<sub>3</sub> Thin Layer for Efficient Photocatalytic Overall Water Splitting

Zhengzhi Han<sup>a,b</sup>, Xiaofeng Ning<sup>a</sup>, Zhiquan Yin<sup>a</sup>, Bitao Su<sup>b\*</sup>, Wenlong Zhen<sup>a\*</sup>

<sup>a</sup> State Key Laboratory of Low Carbon Catalysis and Carbon Dioxide Utilization, Lanzhou Institute of Chemical Physics, Chinese Academy of Sciences, Lanzhou, 730000, China

<sup>b</sup> Key Laboratory of Eco-Functional Polymer Materials of the Ministry of Education, Key Laboratory of Eco-Environmental Polymer Materials of Gansu Province, College of Chemistry and Chemical Engineering, Northwest Normal University, Lanzhou, 730070, China

\*Corresponding authors.

E-mail addresses: subt0608@163.com (B. Su), zhenwenlong123@126.com (W. Zhen)

## Experimental Methods

### Materials.

No further purification was conducted on any of the chemical reagents, all of which were of analytical grade (AR) and used as supplied. Chloroplatinic acid hexahydrate ( $\text{H}_2\text{PtCl}_6 \cdot 6\text{H}_2\text{O}$ , Xilong Science Co., Ltd., AR,  $\geq 99.0\%$ ); melamine ( $\text{C}_3\text{H}_6\text{N}_6$ , Macklin Biochemical Co., Ltd., AR,  $\geq 99.0\%$ ); urea ( $\text{CH}_4\text{N}_2\text{O}$ , Macklin Biochemical Co., Ltd., AR,  $\geq 99.0\%$ ); sulfamic acid ( $\text{NH}_2\text{SO}_3\text{H}$ , Xilong Science Co., Ltd., AR,  $\geq 99.5\%$ ); anhydrous sodium sulfate ( $\text{Na}_2\text{SO}_4$ , Macklin Biochemical Co., Ltd., AR,  $\geq 99\%$ ); anhydrous ethanol ( $\text{CH}_3\text{CH}_2\text{OH}$ , Xilong Science Co., Ltd., AR,  $\geq 99.7\%$ ); chromium(III) nitrate nonahydrate ( $\text{Cr}(\text{NO}_3)_3 \cdot 9\text{H}_2\text{O}$ , Macklin Biochemical Co., Ltd., AR,  $\geq 99.7\%$ ).

### Characterizations

The crystal structure of the catalysts was analyzed using X-ray diffraction (XRD, D8-FOCUS, BrukerAXS, Panalytical). The morphology and microstructure of the samples were characterized by scanning electron microscopy (SEM) and high-resolution transmission electron microscopy (HRTEM). The chemical composition and chemical states of the catalyst were characterized using an ESCALAB 210 X-ray photoelectron spectrometer (XPS, VG Scientific, UK) with an Al target. UV-visible diffuse reflectance spectroscopy measurements were conducted using a Hewlett-Packard 8453 spectrophotometer with  $\text{BaSO}_4$  powder as the background reference for baseline correction. Steady-state fluorescence spectra were recorded using a FluoroMax-4 fluorescence spectrometer (Horiba Scientific, France).

### Preparation Method

#### Preparation of $\text{C}_3\text{N}_4$

$\text{C}_3\text{N}_4$  was synthesized via a conventional thermal polymerization method. A typical procedure is as follows: 25 g urea in a 60mm crucible subjected to the calcination at  $550^\circ\text{C}$  for 4 h, with a heating rate of  $2.5^\circ\text{C min}^{-1}$ . After holding, allow to cool naturally to  $25^\circ\text{C}$ . The obtained bulk solid was ground thoroughly into a fine powder using a mortar. The as-prepared powder was then placed again in a 100 mL

crucible heated at 510°C for 2 hours, then allow to cool naturally to 25 °C. The resulting product was denoted as C<sub>3</sub>N<sub>4</sub>.

### **Preparation of Pt/C<sub>3</sub>N<sub>4</sub>**

The loading of Pt nanoparticles on the C<sub>3</sub>N<sub>4</sub> surface was achieved by an in-situ photodeposition method. The detailed procedure is described as follows: 400 mg of C<sub>3</sub>N<sub>4</sub> catalyst was weighed into a quartz reactor, followed by the addition of 180 mL of distilled water and a corresponding amount of H<sub>2</sub>PtCl<sub>6</sub> solution with different Pt mass fractions (0.2%, 0.5%, 0.8%, 1%, 1.5%). The mixture was subjected to photodeposition under ultraviolet (UV) light for 24 h. The product was filtered, washed with distilled water three times, and dried at 60 °C. The resulting composite was labeled as Pt/C<sub>3</sub>N<sub>4</sub>.

### **Synthesis of Cr<sub>2</sub>O<sub>3</sub>/Pt/C<sub>3</sub>N<sub>4</sub>**

Cr<sub>2</sub>O<sub>3</sub>/Pt/C<sub>3</sub>N<sub>4</sub> was fabricated using an in-situ photodeposition method. A typical synthesis process is as follows: 120 mg of Pt/C<sub>3</sub>N<sub>4</sub> catalyst was weighed into a quartz reactor, mixed with 180 mL of distilled water, and then an appropriate amount of Cr(NO<sub>3</sub>)<sub>3</sub> solution was added. The mixture was irradiated under UV light for 24 h for photodeposition. After the reaction finished, the obtained product underwent filtration, was rinsed three times using 100 mL of distilled water every time, and finally dried at 60 °C. The final composite was designated as Cr<sub>2</sub>O<sub>3</sub>/Pt/C<sub>3</sub>N<sub>4</sub>.

## **Experiment on Photocatalytic OWS**

The photocatalytic OWS performance of all catalysts was evaluated at room temperature and atmospheric pressure using a 197 mL quartz reactor. The detailed test procedure is as follows: 50 mg of catalyst and 100 mL of deionized water were transferred into the reactor, followed by ultrasonication to disperse the catalyst in the deionized water. Air in the reactor was replaced with argon. A xenon lamp was used as the light source, and the optical power of the xenon lamp was adjusted for each test. The gases generated from photocatalytic overall water splitting were analyzed by gas chromatography.

## **Isotope Labeling Experiment**

10 mg of catalyst was dispersed in a sealed glass bottle containing 10 mL of D<sub>2</sub>O

or 1 mL of H<sub>2</sub><sup>18</sup>O. After ultrasonic dispersion for 30 minutes, argon (Ar) was bubbled through to displace oxygen in the reaction bottle for 10 minutes. Following 6 h of full light irradiation, 0.5 mL of gas was extracted from the silicone pad on the reaction bottle and injected into a GC-MS system. The gas phase components were analyzed by referring to the NIST mass spectral database, and the origin of the gas was typically determined by analyzing the m/z signals.

### **Hydrogen-oxygen recombination test**

The hydrogen-oxygen recombination performance of the catalyst was tested in a 197 mL quartz reactor wrapped with aluminum foil. In a typical measurement: 100 mL of deionized water and 100 mg of catalyst were added into the reactor, and the catalyst was fully dispersed via ultrasonication. The reactor was purged with argon to remove residual air. Then, 3 mL of oxygen and 6 mL of hydrogen were injected into the reactor, followed by continuous stirring. The gas composition in the reaction system was analyzed by gas chromatography every 10 min.

### **Photoelectrochemical performance experiment**

Photoelectrochemical tests and analysis were accomplished on a CHI 660E electrochemical workstation. A typical three-electrode system was employed, in which a platinum sheet and a saturated calomel electrode (SCE) served as the counter electrode and reference electrode, respectively. The working electrode was prepared by directly drop-casting the as-prepared sample suspension onto a pre-cleaned FTO glass substrate with an effective area of 1.5 cm × 1.5 cm. A 300 W xenon lamp with full-spectrum output was used as the light source to simulate sunlight for photocurrent tests. Both electrochemical impedance spectroscopy and photocurrent measurements were carried out at room temperature in a 0.2 mol L<sup>-1</sup> Na<sub>2</sub>SO<sub>4</sub> aqueous solution.

### **AQY experiments**

Under identical photocatalytic reaction conditions, the apparent quantum yield (AQY) of the catalyst was determined by regulating the incident wavelength using band-pass filters centered at 375, 405, 430, 460 and 520 nm, respectively.

The AQY were tested at 25 °C in a 236 mL reactor. In a typical process, a

mixture of 250 mg of fresh-catalyst and 100 mL of distilled water was ultrasonically dispersed for 20 minutes. The liquid mixture in the quartz reactor is bubbled by argon gas for 15 minutes to replace the air with argon. The distance between the light source (NBeT, HSX-F/UV 300 Xe-lamp) and the quartz photocatalytic reactor is 10cm. The irradiation area is 1 cm<sup>2</sup>.

AQY was calculated as follow:

$$AQY = \frac{N_e}{N_p} \times 100\% = \frac{2 \times n(H_2)}{t \times Q \times A} \times 100\%$$

Where,  $n(H_2)$  is the amount of H<sub>2</sub> molecules (umol), Q is Total number of incident photons (umol m<sup>-2</sup> s<sup>-1</sup>), A is the irradiation area (cm<sup>2</sup>), t is the photoreaction time (s).

## Fluorescence property measurements

Photoluminescence spectra (PL) were obtained by FluoroMax-4 fluorescence spectrometer (Horiba Scientific, Japan). Time-resolved Photoluminescence spectra (TRPL) were measured on Horiba Jobin Yvon HUB workstation. The workstation was equipped with a time-dependent single-photon counting method with a time resolution of 200 ps, and the excitation source was 371 nm nanodiode exciter (pulse frequency: 1 MHz). The experimental results were fitted with Horiba Jobin Yvon DAS6 fluorescence lifetime analysis software.

## DFT calculation

We used the DFT as implemented in the Vienna Ab initio simulation package (VASP) in all calculations. The exchange-correlation potential is described by using the generalized gradient approximation of Perdew-Burke-Ernzerhof (GGA-PBE). The projector augmented-wave (PAW) method is employed to treat interactions between ion cores and valence electrons. The plane-wave cutoff energy was fixed to 450 eV. Given structural models were relaxed until the Hellmann-Feynman forces smaller

than  $-0.02 \text{ eV/\AA}$  and the change in energy smaller than  $10^{-5} \text{ eV}$  was attained. The long-range van der Waals interaction is described by the DFT-D3 approach.

The adsorption energy ( $E_{\text{ads}}$ ) of species is calculated by:

$$E_{\text{ads}} = E(\text{system}) - E(\text{catalyst}) - E(\text{species})$$

where  $E(\text{system})$ ,  $E(\text{catalyst})$ , and  $E(\text{species})$  are the total energy of the optimized system with adsorbed species, the isolated catalyst, and species, respectively.

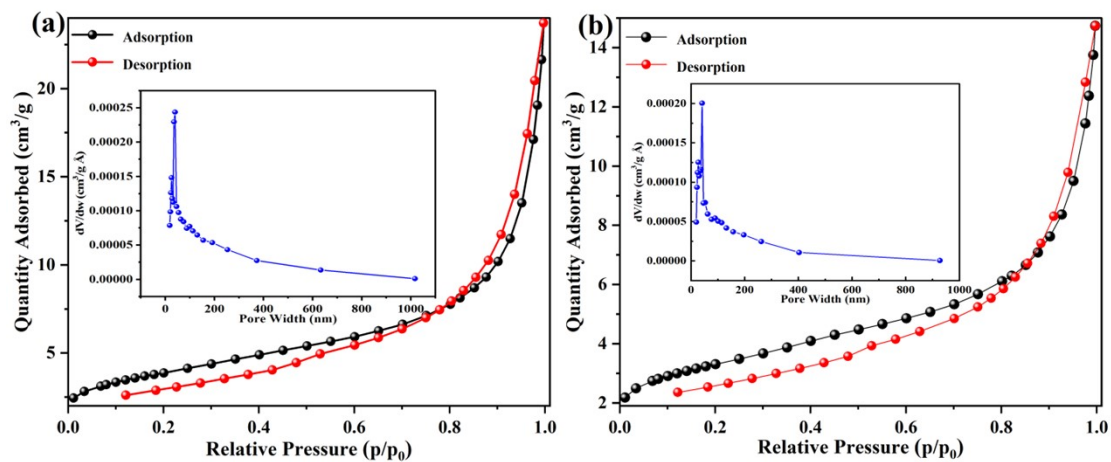

**Figure S1.** N<sub>2</sub> adsorption–desorption isotherms of (a) Cr<sub>2</sub>O<sub>3</sub>/Pt/C<sub>3</sub>N<sub>4</sub>, (b) C<sub>3</sub>N<sub>4</sub>

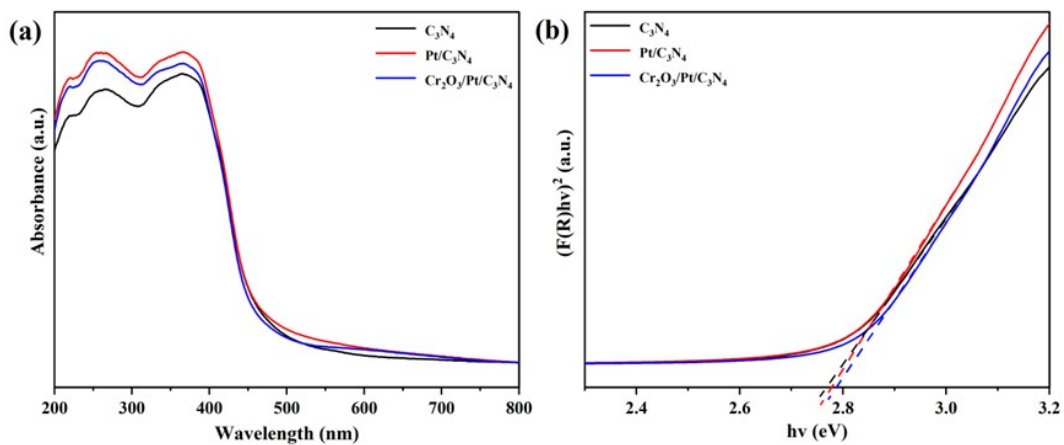

**Figure S2** (a) UV-visible diffuse reflection spectra, (b) band gap energies of C<sub>3</sub>N<sub>4</sub>, Pt/C<sub>3</sub>N<sub>4</sub>, and Cr<sub>2</sub>O<sub>3</sub>/Pt/C<sub>3</sub>N<sub>4</sub>

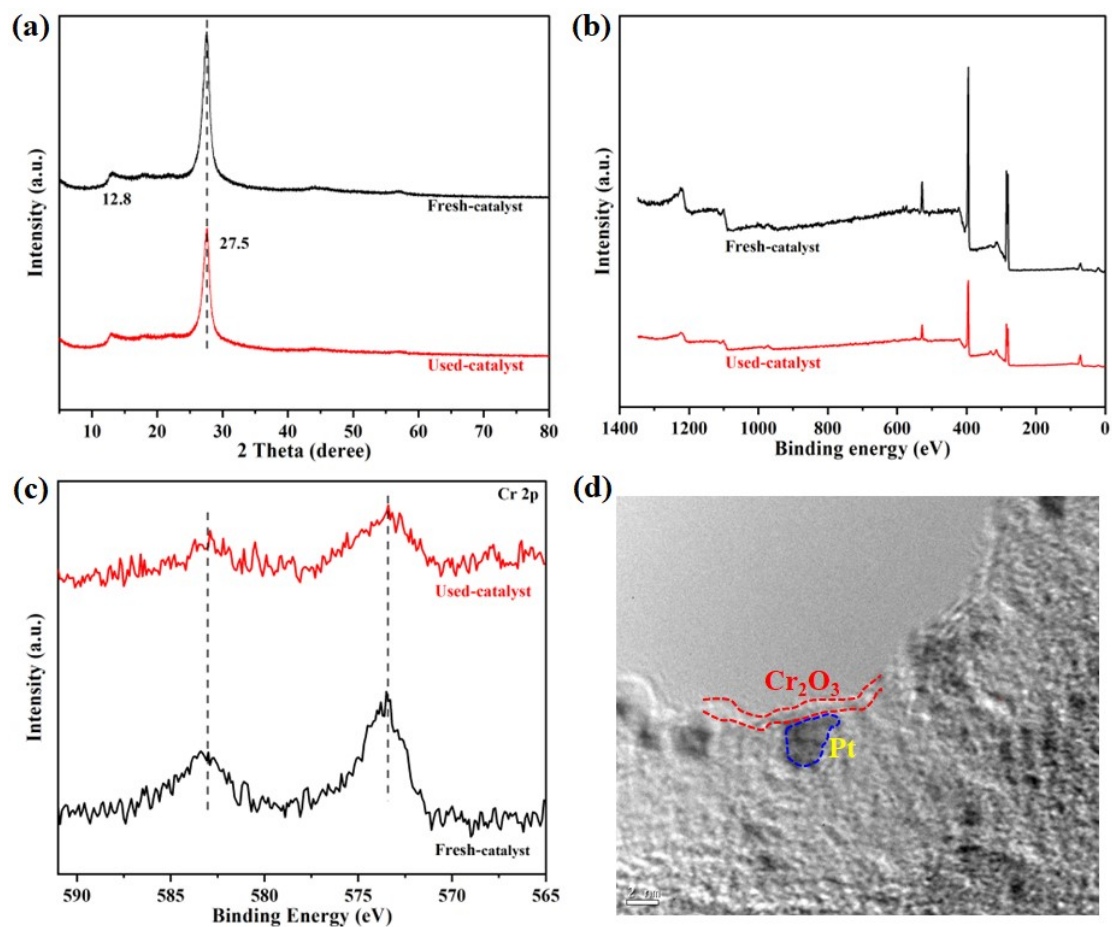

**Figure S3** Comparison of (a) XRD patterns, (b) XPS survey spectra and (c) Cr 2p XPS survey spectra of used and fresh  $\text{Cr}_2\text{O}_3/\text{Pt}/\text{C}_3\text{N}_4$  sample, (d) TEM images of the used  $\text{Cr}_2\text{O}_3/\text{Pt}/\text{C}_3\text{N}_4$  sample

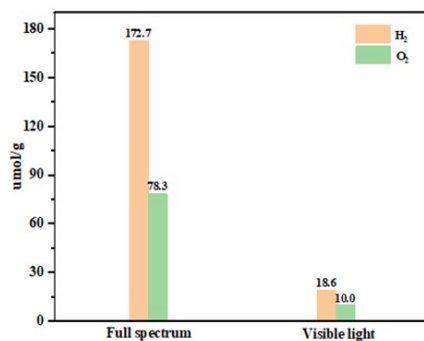

**Figure S4** Overall water splitting performance of  $\text{Cr}_2\text{O}_3/\text{Pt}/\text{C}_3\text{N}_4$  under visible light and full-spectrum conditions;

**Table S1.**  $S_{\text{BET}}$ , average pore size, and pore volumes of as-prepared catalysts

| Samples                                                | $S_{\text{BET}}$ ( $\text{m}^2 \text{g}^{-1}$ ) | Average pore size (nm) | Pore volume ( $\text{cm}^3 \text{g}^{-1}$ ) |
|--------------------------------------------------------|-------------------------------------------------|------------------------|---------------------------------------------|
| $\text{C}_3\text{N}_4$                                 | 11.69                                           | 7.27                   | 0.021                                       |
| $\text{Cr}_2\text{O}_3/\text{Pt}/\text{C}_3\text{N}_4$ | 13.90                                           | 9.63                   | 0.033                                       |

**Table S2** Overview of key research on C<sub>3</sub>N<sub>4</sub>-derived photocatalysts for photocatalytic overall-water-splitting processes

| Catalysts                                                                        | Test Conditions                                                                               | H <sub>2</sub> evolution rate of OWS ( $\mu\text{mol h}^{-1} \text{g}^{-1}$ ) | AQY                                                 | References |
|----------------------------------------------------------------------------------|-----------------------------------------------------------------------------------------------|-------------------------------------------------------------------------------|-----------------------------------------------------|------------|
| C <sub>3</sub> N <sub>4</sub>                                                    | under ambient temperature and atmospheric pressure; 300 W Xe lamp                             | 34.5                                                                          | 0.63% at 375 nm                                     | This work  |
| TiO <sub>2</sub> /C <sub>3</sub> N <sub>4</sub>                                  | 5 mM NaI or 2 mM FeCl <sub>2</sub> ; 150W Xe lamp                                             | 502                                                                           | 4.94% and 4.01% under 365 and 405 nm, respectively. | 1          |
| CoO/g-C <sub>3</sub> N <sub>4</sub>                                              | Water ; 300 W xenon lamp                                                                      | 25.1                                                                          | -                                                   | 2          |
| phosphorus doped g-C <sub>3</sub> N <sub>4</sub> /Ti <sub>3</sub> C <sub>2</sub> | under ambient temperature and atmospheric pressure; 300 W Xe lamp                             | 627.1                                                                         | 4.9% at 420 nm.                                     | 3          |
| boron phosphide/graphitic carbon nitride (BP@g-C <sub>3</sub> N <sub>4</sub> )   | under ambient temperature and atmospheric pressure; 300 W Xe lamp with a 420 nm cutoff filter | 31.5                                                                          | 0.03% at 400 nm                                     | 4          |
| CoP/CoO@g-C <sub>3</sub> N <sub>4</sub>                                          | 300 W Xenon lamp                                                                              | 133.2                                                                         | 0.53% at 420 nm                                     | 5          |
| Pt/g-C <sub>3</sub> N <sub>4</sub> -D2/5%Co <sub>3</sub> O <sub>4</sub>          | 300 W Xenon lamp                                                                              | 49.60                                                                         | 11.94 % at 400 nm                                   | 6          |
| WC1-x/g-C <sub>3</sub> N <sub>4</sub>                                            | 300 W Xenon lamp                                                                              | 84.1                                                                          | 11.24% at 420 nm                                    | 7          |
| g-C <sub>3</sub> N <sub>4</sub> /rGO/PDIP                                        | 300 W Xe lamp                                                                                 | 632                                                                           | AQY 4.94% at 420 nm and STH 0.30%                   | 8          |
| 3D g-C <sub>3</sub> N <sub>4</sub> NS                                            | 300 W Xe lamp under visible light                                                             | 101.4                                                                         | 1.4% at 420 nm                                      | 9          |
| MOC/g-C <sub>3</sub> N <sub>4</sub>                                              | 300 W Xe lamp                                                                                 | 80.1                                                                          | 31.6% at 425 nm                                     | 10         |

## References

- 1 Junqing Yan, Huan Wu, Hong Chen, Yunxia Zhang, Fuxiang Zhang, Shengzhong Frank Liu. Fabrication of  $\text{TiO}_2/\text{C}_3\text{N}_4$  heterostructure for enhanced photocatalytic Z-scheme overall water splitting. *Applied Catalysis B: Environmental* 191 (2016) 130–137.
- 2 Feng Guo, Weilong Shi, Cheng Zhu, Hao Li, Zhenhui Kang, CoO and g- $\text{C}_3\text{N}_4$  complement each other for highly efficient overall water splitting under visible light, *Applied Catalysis B: Environmental* 226 (2018) 412–420.
- 3 Zizheng Ai, Yongliang Shao, Bin Chang, Lei Zhang, Jianxing Shen, Yongzhong Wu, Baibiao Huang, Xiaopeng Hao, Rational modulation of p-n homojunction in P-doped g- $\text{C}_3\text{N}_4$  decorated with  $\text{Ti}_3\text{C}_2$  for photocatalytic overall water splitting. *Applied Catalysis B: Environmental* 259 (2019) 118077.
- 4 Bin Tian, Yuqi Wu, Gongxuan Lu, Metal-free plasmonic boron phosphide/graphitic carbon nitride with core-shell structure photocatalysts for overall water splitting, *Applied Catalysis B: Environmental* 280 (2021) 119410
- 5 Xiaoqing Yan, Zihao Chen, Yufei Yue, Ruijie Chai, Honghui Ou, Yang Li, Guidong Yang, Janus cobalt sites on carbon nitride for efficient photocatalytic overall water splitting, *Applied Catalysis B: Environmental* 360 (2025) 124527
- 6 Yifan Shao, Xuqiang Hao, Shunda Lu, Zhiliang Jin. Molten salt-assisted synthesis of nitrogen-vacancy crystalline graphitic carbon nitride with tunable band structures for efficient photocatalytic overall water splitting. *Chemical Engineering Journal* 454 (2023) 140123
- 7 Ye Xiong, Yipeng Chen, Ning Yang, Chunde Jin, and Qingfeng Sun. WC1-x-coupled 3D porous defective g- $\text{C}_3\text{N}_4$  for efficient photocatalytic overall water splitting, *Solar RRL* 3 (2019) 1800341.
- 8 Xianjie Chen, Jun Wang, Yongqiang Chai, Zijian Zhang, and Yongfa Zhu. Efficient Photocatalytic Overall Water Splitting Induced by the Giant Internal Electric Field of a g- $\text{C}_3\text{N}_4/\text{rGO}/\text{PDIP}$  Z-Scheme Heterojunction. *Adv. Mater.* 2021, 33, 2007479.
- 9 Xianjie Chen, Run Shi, Qian Chen, Zijian Zhang, Wenjun Jiang, Yongfa Zhu, Tierui Zhang. Three-dimensional porous g- $\text{C}_3\text{N}_4$  for highly efficient photocatalytic overall water splitting. *Nano Energy* 59 (2019) 644–650
- 10 Xin-Ao Li, Li-Lin Tan, Xiao-Lin Wang, Yang Liu, Zi-Zhan Liang, Jian-Feng Huang, Li-Min

Xiao and Jun-Min Liu. A Z-scheme photosensitive MOC/g-C<sub>3</sub>N<sub>4</sub> composite catalyst for efficient visible-light driven half and overall water splitting. *J. Mater. Chem. A*, 2024, 12, 32307–32317.
